# Supplementary material for: Enhancing Signal and Network Integrity: Evaluating BCG Artifact Removal Techniques in Simultaneous EEG-fMRI Data
Source: Research Square preprint supplement (doi:10.21203/rs.3.rs-7553208/v1), 2025-09-11
Supplement: Supplementary file 1 [file cac25128e63e4fbfce784b45.docx]

**Enhancing Signal and Network Integrity: Evaluating BCG Artifact Removal Techniques in Simultaneous EEG-fMRI Data**

***Supplementary Metarials***

**Table 1. Comparison of artifact removal methods according to signal quality metrics**

| **Mean ± SD** | **MSE** | **PSNR** | **SNR** | **SSIM** | **DTW** | **PTPR** |
| --- | --- | --- | --- | --- | --- | --- |
| **AAS** | 0,0038 ± 0,0032 | 26,3484 ± 2,8016 | 15,1198 ± 2,6563 | 0,7188 ± 0,0413 | 51,4970 ± 23,9658 | 0,4538 ± 0,1152 |
| **OBS** | 0,0059 ± 0,0036 | 25,1214 ± 3,5812 | 14,4701 ± 3,1858 | 0,7264 ± 0,0425 | 53,7106 ± 25,0494 | 0,4190 ± 0,1067 |
| **ICA** | 0,0067 ± 0,0043 | 25,1823 ± 4,0892 | 14,3125 ± 3,8654 | 0,7063 ± 0,0641 | 56,2264 ± 29,5970 | 0,4507 ± 0,1684 |
| **AAS+ICA** | 0,0035 ± 0,0031 | 27,2753 ± 2,9333 | 16,1648 ± 2,2601 | 0,7403 ± 0,0433 | 52,2920 ± 25,0441 | 0,4828 ± 0,1167 |
| **OBS+ICA** | 0,0054 ± 0,0031 | 26,2289 ± 3,5166 | 15,1749 ± 3,1685 | 0,7502 ± 0,0440 | 51,9202 ± 22,9925 | 0,4491 ± 0,1123 |

**Table 2. P-values ​​for static graphs obtained as a result of AAS method**

| **Frequency Band Pairs** | **CS** | **CC** | **GE** |
| --- | --- | --- | --- |
| Delta-Theta | 0.27930 | 0.12019 | 0.17268 |
| Delta-Alpha | 0.17296 | 0.22743 | 0.19592 |
| Delta-Beta | 0.17464 | 0.17228 | 0.18610 |
| Delta-Gamma | 0.20958 | 0.19324 | 0.19323 |
| Theta-Alpha | 0.12814 | 0.04208 | 0.21031 |
| Theta-Beta | 0.17053 | 0.18233 | 0.17759 |
| Theta-Gamma | 0.21530 | 0.17103 | 0.22149 |
| Alpha-Beta | 0.18875 | 0.17372 | 0.18235 |
| Alpha-Gamma | 0.17705 | 0.17152 | 0.21704 |
| Beta-Gamma | 0.24379 | 0.17654 | 0.18383 |

**Table 3. P-values ​​for static graphs obtained as a result of OBS method**

| **Frequency Band Pairs** | **CS** | **CC** | **GE** |
| --- | --- | --- | --- |
| Delta-Theta | 0.0004 | 0.0014 | 0.0043 |
| Delta-Alpha | 0.0042 | 0.0056 | 0.0082 |
| Delta-Beta | 0.0013 | 0.0007 | 0.0114 |
| Delta-Gamma | 0.00001 | 0.000005 | 0.0059 |
| Theta-Alpha | 0.0056 | 0.0093 | 0.0115 |
| Theta-Beta | 0.000006 | 0.000005 | 0.01015 |
| Theta-Gamma | 0.0000002 | 0.00000006 | 0.0033 |
| Alpha-Beta | 0.00006 | 0.0001 | 0.0093 |
| Alpha-Gamma | 0.00000006 | 0.0000003 | 0.0015 |
| Beta-Gamma | 0.00001 | 0.00001 | 0.0014 |

**Table 4. P-values ​​for static graphs obtained as a result of ICA method**

| **Frequency Band Pairs** | **CS** | **CC** | **GE** |
| --- | --- | --- | --- |
| Delta-Theta | 0.0730 | 0.0938 | 0.1223 |
| Delta-Alpha | 0.0921 | 0.0980 | 0.1611 |
| Delta-Beta | 0.1556 | 0.1404 | 0.0960 |
| Delta-Gamma | 0.1623 | 0.1674 | 0.1271 |
| Theta-Alpha | 0.1635 | 0.1616 | 0.1645 |
| Theta-Beta | 0.0646 | 0.0900 | 0.1198 |
| Theta-Gamma | 0.1068 | 0.0926 | 0.0913 |
| Alpha-Beta | 0.0897 | 0.1319 | 0.0916 |
| Alpha-Gamma | 0.1001 | 0.0949 | 0.0883 |
| Beta-Gamma | 0.1668 | 0.1149 | 0.1657 |

**Table 5. P-values ​​for static graphs obtained as a result of AAS+ICA method**

| **Frequency Band Pairs** | **CS** | **CC** | **GE** |
| --- | --- | --- | --- |
| Delta-Theta | 0.5618 | 0.3119 | 0.4687 |
| Delta-Alpha | 0.4753 | 0.4894 | 0.5014 |
| Delta-Beta | 0.5455 | 0.4437 | 0.7090 |
| Delta-Gamma | 0.4540 | 0.4758 | 0.7874 |
| Theta-Alpha | 0.3337 | 0.1758 | 0.4984 |
| Theta-Beta | 0.6484 | 0.3787 | 0.4822 |
| Theta-Gamma | 0.6688 | 0.6570 | 0.5966 |
| Alpha-Beta | 0.5245 | 0.4611 | 0.5731 |
| Alpha-Gamma | 0.4468 | 0.4438 | 0.7521 |
| Beta-Gamma | 0.5588 | 0.5881 | 0.4939 |

**Table 6. P-values ​​for static graphs obtained as a result of OBS+ICA method**

| **Frequency Band Pairs** | **CS** | **CC** | **GE** |
| --- | --- | --- | --- |
| Delta-Theta | 0.0004 | 0.0014 | 0.0043 |
| Delta-Alpha | 0.0042 | 0.0056 | 0.0082 |
| Delta-Beta | 0.0013 | 0.0007 | 0.0114 |
| Delta-Gamma | 0.00001 | 0.000005 | 0.0059 |
| Theta-Alpha | 0.0056 | 0.0093 | 0.0115 |
| Theta-Beta | 0.000006 | 0.000005 | 0.0101 |
| Theta-Gamma | 0.0000002 | 0.0000006 | 0.0033 |
| Alpha-Beta | 0.00006 | 0.0001 | 0.0093 |
| Alpha-Gamma | 0.00000006 | 0.00000003 | 0.0015 |
| Beta-Gamma | 0.00001 | 0.00001 | 0.0014 |

**Table 7. P-values ​​for dynamic graphs obtained as a result of AAS method**

| **Frequency Band Pairs** | **CS** | **CC** | **GE** |
| --- | --- | --- | --- |
| Delta-Theta | 0.0024 | 0.0007 | 0.0095 |
| Delta-Alpha | 0.0060 | 0.0015 | 0.0023 |
| Delta-Beta | 0.0018 | 0.0004 | 0.0069 |
| Delta-Gamma | 0.0030 | 0.0095 | 0.0008 |
| Theta-Alpha | 0.0125 | 0.0094 | 0.0032 |
| Theta-Beta | 0.0033 | 0.0005 | 0.0091 |
| Theta-Gamma | 0.0016 | 0.0028 | 0.0006 |
| Alpha-Beta | 0.0024 | 0.0009 | 0.0143 |
| Alpha-Gamma | 0.0018 | 0.0030 | 0.0009 |
| Beta-Gamma | 0.0006 | 0.0005 | 0.0006 |

**Table 8. P-values ​​for dynamic graphs obtained as a result of OBS method**

| **Frequency Band Pairs** | **CS** | **CC** | **GE** |
| --- | --- | --- | --- |
| Delta-Theta | 0.00001 | 0.00008 | 0.00001 |
| Delta-Alpha | 0.00019 | 0.00077 | 0.00007 |
| Delta-Beta | 0.0000003 | 0.00000005 | 0.00001 |
| Delta-Gamma | 0.000004 | 0.000007 | 0.000003 |
| Theta-Alpha | 0.00093 | 0.00127 | 0.0003 |
| Theta-Beta | 0.0000006 | 0.0000001 | 0.000001 |
| Theta-Gamma | 0.0000007 | 0.000001 | 0.0000003 |
| Alpha-Beta | 0.0000001 | 0.00000007 | 0.0000004 |
| Alpha-Gamma | 0.000003 | 0.000006 | 0.000001 |
| Beta-Gamma | 0.0033 | 0.0043 | 0.0019 |

**Table 9. P-values ​​for dynamic graphs obtained as a result of ICA method**

| **Frequency Band Pairs** | **CS** | **CC** | **GE** |
| --- | --- | --- | --- |
| Delta-Theta | 0.0009 | 0.00108 | 0.00111 |
| Delta-Alpha | 0.0004 | 0.0008 | 0.00023 |
| Delta-Beta | 0.000007 | 0.00001 | 0.000007 |
| Delta-Gamma | 0.00000005 | 0.0000001 | 0.00000006 |
| Theta-Alpha | 0.0013 | 0.0015 | 0.0015 |
| Theta-Beta | 0.0000007 | 0.0000007 | 0.000003 |
| Theta-Gamma | 0.00000003 | 0.00000005 | 0.00000005 |
| Alpha-Beta | 0.00000004 | 0.00000004 | 0.00000009 |
| Alpha-Gamma | 0.00000001 | 0.00000009 | 0.00000008 |
| Beta-Gamma | 0.000152 | 0.000159 | 0.0002 |

**Table 10. P-values ​​for dynamic graphs obtained as a result of AAS+ICA method**

| **Frequency Band Pairs** | **CS** | **CC** | **GE** |
| --- | --- | --- | --- |
| Delta-Theta | 0.0270 | 0.0300 | 0.2360 |
| Delta-Alpha | 0.0466 | 0.0247 | 0.0901 |
| Delta-Beta | 0.0432 | 0.0165 | 0.0942 |
| Delta-Gamma | 0.0966 | 0.2378 | 0.0313 |
| Theta-Alpha | 0.1851 | 0.0675 | 0.0640 |
| Theta-Beta | 0.0970 | 0.0302 | 0.0957 |
| Theta-Gamma | 0.0497 | 0.0966 | 0.0260 |
| Alpha-Beta | 0.1230 | 0.0558 | 0.1596 |
| Alpha-Gamma | 0.0514 | 0.0858 | 0.0270 |
| Beta-Gamma | 0.0269 | 0.0231 | 0.0247 |

**Table 11. P-values ​​for dynamic graphs obtained as a result of OBS+ICA method**

| **Frequency Band Pairs** | **CS** | **CC** | **GE** |
| --- | --- | --- | --- |
| Delta-Theta | 0.00001 | 0.00008 | 0.00001 |
| Delta-Alpha | 0.00019 | 0.00078 | 0.00007 |
| Delta-Beta | 0.0000003 | 0.0000005 | 0.00001 |
| Delta-Gamma | 0.000004 | 0.000007 | 0.000003 |
| Theta-Alpha | 0.0009 | 0.0012 | 0.0003 |
| Theta-Beta | 0.00000006 | 0.00000001 | 0.000001 |
| Theta-Gamma | 0.0000008 | 0.000001 | 0.0000003 |
| Alpha-Beta | 0.00000001 | 0.00000006 | 0.0000004 |
| Alpha-Gamma | 0.000003 | 0.000006 | 0.000001 |
| Beta-Gamma | 0.0034 | 0.0044 | 0.0019 |
